# Supplementary material for: The Influence of Sociodemographic Factors on Symptoms of Anxiety, the Level of Aggression and Alcohol Consumption in the Time of the COVID-19 Pandemic among Polish Respondents
Source: Int J Environ Res Public Health. 2022 Jun 9;19(12):7081. doi: 10.3390/ijerph19127081 (PMC9222902; doi:10.3390/ijerph19127081)
Supplement: Supplementary file 1 [file ijerph-19-07081-s001.zip › ijerph-1699704-supplementary.pdf]

**Table S1.** Structure of the studied group in comparison to data from the Statistical Yearbook of the Central Statistical Office of Poland 2019.

|                       | Number of respondents | Percentage value to the number of respondents [%] | Percentage values to the Polish population according to GUS [%] |
|-----------------------|-----------------------|---------------------------------------------------|-----------------------------------------------------------------|
| Number of respondents | 538                   | 100                                               | -                                                               |
| Sex:                  |                       |                                                   |                                                                 |
| • men                 | 125                   | 23.23                                             | 47.73                                                           |
| • women               | 413                   | 76.77                                             | 52.27                                                           |
| Age:                  |                       |                                                   |                                                                 |
| • 18-29               | 366                   | 68.03                                             | Working-age population:<br><b>60.58</b>                         |
| • 30-49               | 147                   | 27.32                                             |                                                                 |
| • 50+                 | 25                    | 4.65                                              |                                                                 |
| Domicile:             |                       |                                                   |                                                                 |
| • village             | 105                   | 19.52                                             | 39.90                                                           |
| • city                | 433                   | 80.48                                             | 60.10                                                           |
| Education:            |                       |                                                   |                                                                 |
| • basic               | 7                     | 1.30                                              | 19.2                                                            |
| • professional        | 1                     | 0.19                                              | 20.8                                                            |
| • medium              | 254                   | 47.21                                             | 31.9                                                            |
| • higher              | 271                   | 50.37                                             | 26.4                                                            |
| • no answer           | 5                     | 0.93                                              | -                                                               |
